# Supplementary material
Source: PubMed Central journal article supplement (PMC4280609)
Supplement: pnas.201411959SI.pdf [file pnas.201411959SI.pdf]

fragment N<sub>30K</sub> but not N<sub>29K</sub> was coimmunoprecipitated with C<sub>58K</sub>:HN > AA. (C) Coexpression of the inactive CAPN3 mutant, FL:CAA, with either C<sub>58K</sub> or C<sub>58K</sub>:ΔIS2 N-terminally FLAG-tagged fragments reconstituted the autolytic reaction (lanes 10 and 12, open arrowhead). Mutation of His334 and N358D in C<sub>58K</sub> (lane 11) or of Cys129 in FL:CAA (lanes 15 and 17) abrogated the reconstitution of the autolytic reaction, and C<sub>58K</sub> was not detected. Under the same context, FLAG-CAPN2: C<sub>53K</sub> was also unable to complement mutant forms of FL-CAPN3 (lanes 13 and 18).

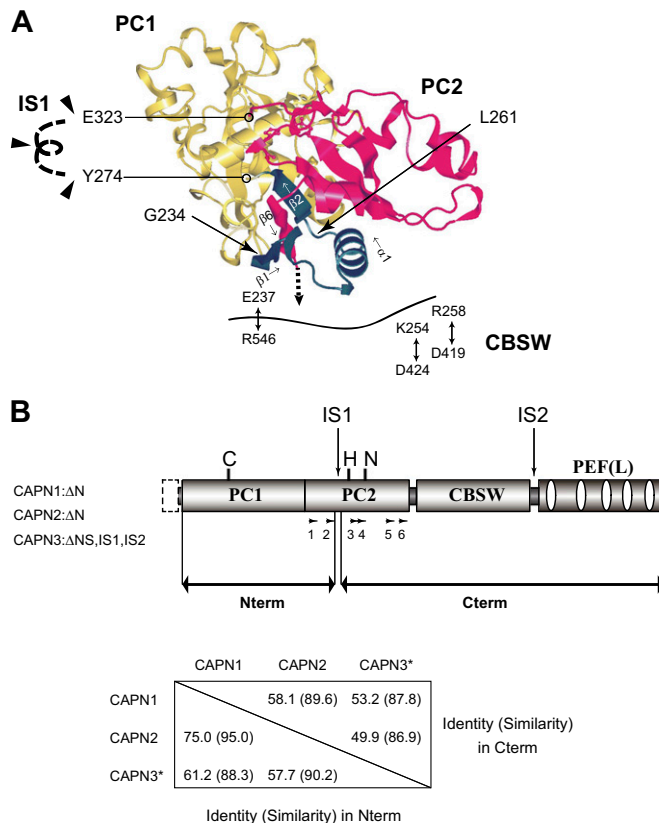

**Fig. S2.** Contribution of the PC2 structure in CAPN3 iMOC. (A) Structure of the Ca<sup>2+</sup>-bound form of the rat CAPN2 CysPc domain (Protein Data Bank 1MDW), showing the positions of the amino acid residues N<sub>26K</sub> and N<sub>29K</sub> in Fig. 1 and Fig. S3. Bidirectional vertical arrows indicate electrostatic interactions between amino acid residues in PC2 and those in the linker and CBSW regions identified in the rat CAPN2 structure; the numbers reflect the corresponding amino acid residues in the CAPN3 sequence. (B) Sequence homology comparisons of the N- and C-terminal regions in CAPN1–3. Given that NS, IS1, and IS2 were demonstrated to be dispensable for iMOC, the CAPN3 sequence is represented by that of FL:ΔNS/IS1/IS2, and the N-terminal regions are omitted from the CAPN1 and -2 sequences.

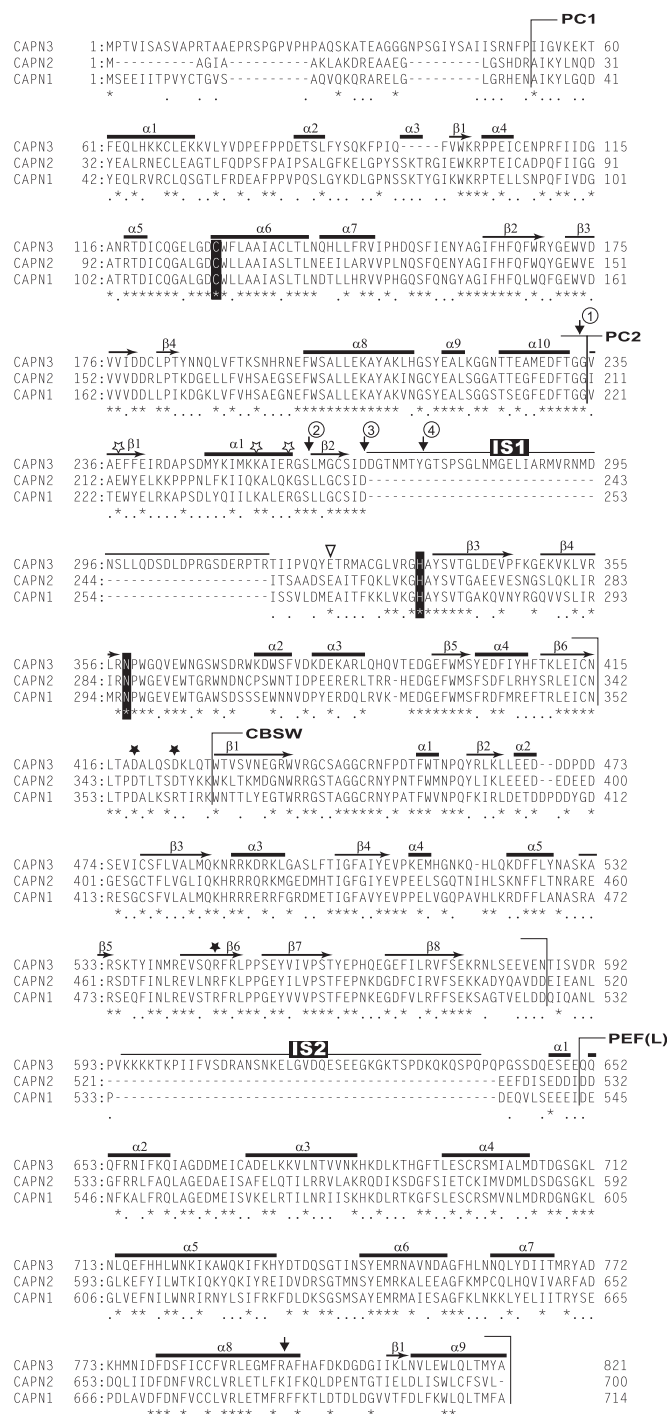

**Fig. S3.** Structure-based amino acid sequence alignment of calpains. Secondary structures,  $\alpha$ -helices and  $\beta$ -strands, identified in the structure of a  $\text{Ca}^{2+}$ -bound form of rat CAPN2/CAPN1, are indicated above the sequence of human CAPN1–3. Vertical arrows show the ends of the CAPN3 N-terminal constructs: N<sub>26K</sub>, N<sub>29K</sub>, N<sub>30K</sub>, and N<sub>31K</sub>. Open arrowhead shows the first amino acid residue in C<sub>58K</sub> and the corresponding CAPN2:C<sub>53K</sub> construct. Open and closed stars show amino acid residues involved in electrostatic interactions in PC2 and CBSW, respectively. Horizontal arrows show  $\beta$ 1– $\beta$ 6 strands in PC2, corresponding to those depicted in Fig. S2B. The following sequences were used: CAPN1, P07384; CAPN2, P17655; and CAPN3, P20807.

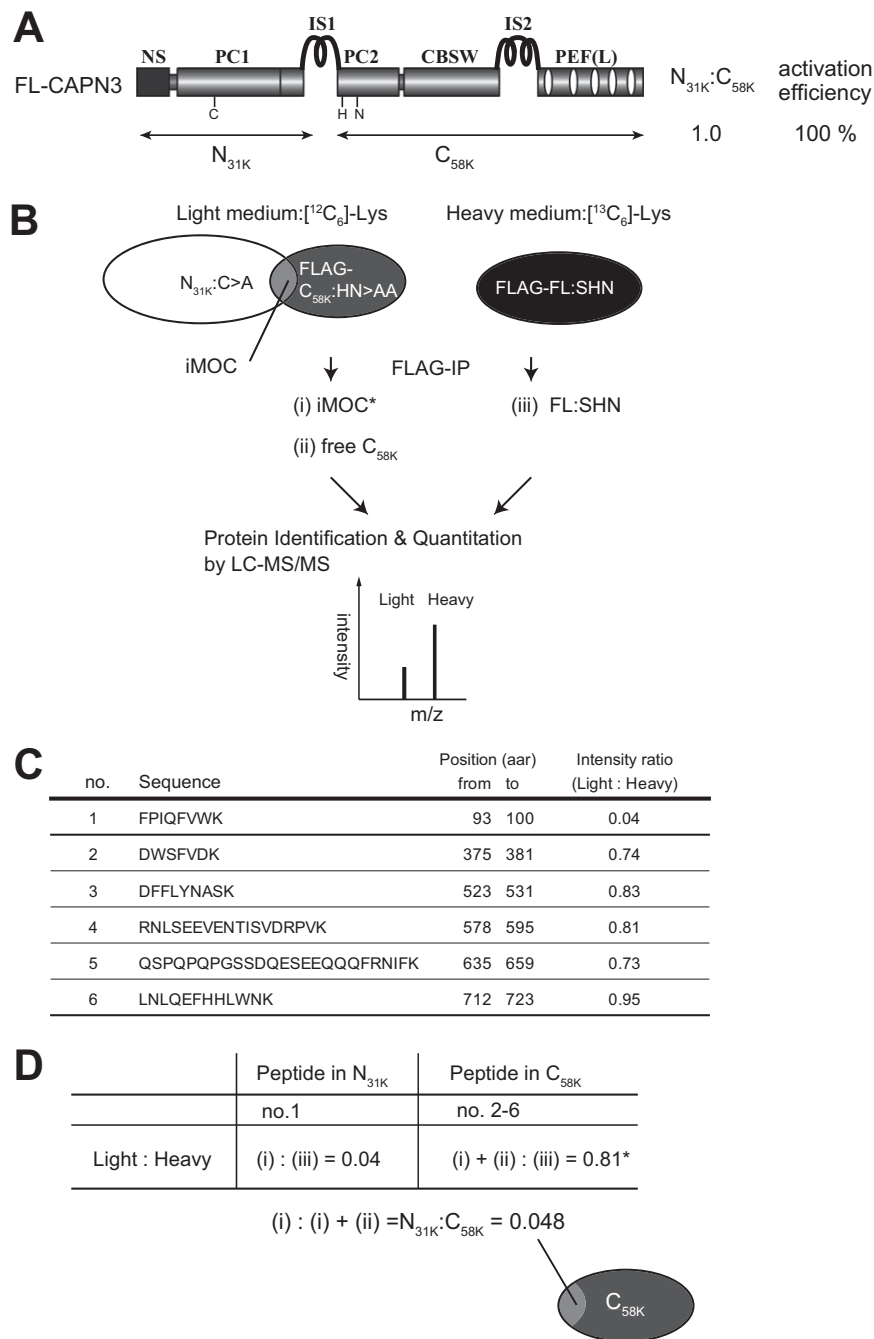

**Fig. S4.** SIALC-based quantification of  $N_{31K}$ - $C_{58K}$  interaction. (A) It is hypothesized that  $N_{31K}:C_{58K} = 1.0$  corresponds to 100% activation, as in the case of FL-CAPN3. (B) Schematic illustration of the experimental procedure. Under the condition used,  $N_{31K}:C > A$  is expressed in excess of  $C_{58K}:HN > AA$ . \* $N_{31K}$  is coimmunoprecipitated. (C) The peak intensity ratio (light:heavy) was calculated for selected peptides. (D) Intensity ratios for  $N_{31K}$  and  $C_{58K}$  were used to calculate the molar ratio of  $N_{31K}:C_{58K}$  in the immunoprecipitated sample from light medium. \*Average of peptides nos. 2-6.

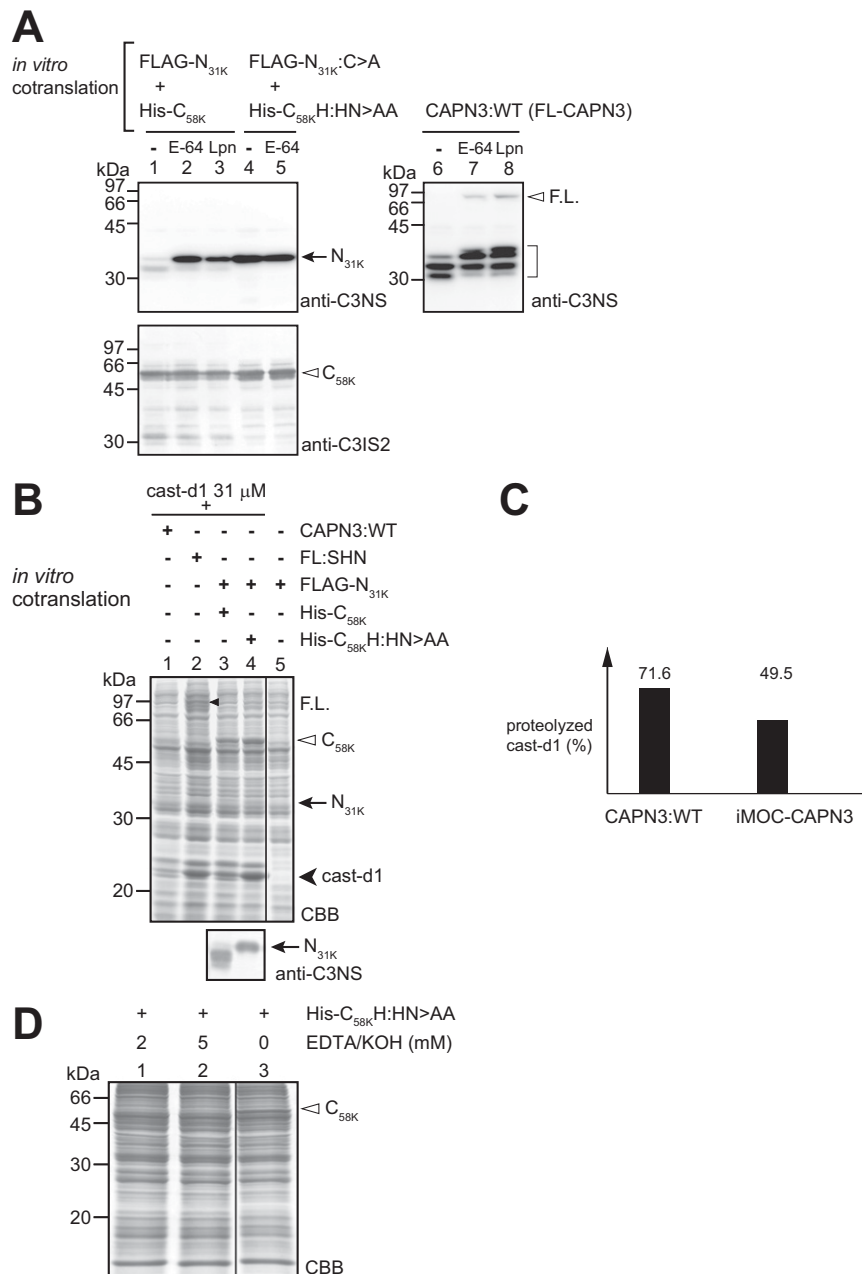

**Fig. S5.** Expression of CAPN3 fragments in *in vitro* translation system. (A) Effect of protease inhibitors. In the presence of 100  $\mu$ M of E-64-c or leupeptin, iMOC-mediated autolysis of CAPN3 was significantly inhibited (anti-C3NS, lanes 2 and 3 vs. lane 1). Autolytic activity of FL-CAPN3 was hardly inhibited (lanes 7 and 8 vs. lane 6). (B) Proteolysis of CAST. Translation reaction was carried out in the presence of cast-d1. Protease activity-dependent decrease of cast-d1 was observed (CBB, lane 1 vs. lanes 2 and 3 vs. lane 4). Generation of autolytic fragment N<sub>31K</sub> was not inhibited (anti-C3NS, lane 3). (C) CAST-proteolytic activity of FL-CAPN3 and iMOC-CAPN3. Decrease of signal intensity of cast-d1 was expressed using protease-inactive mutant as a negative control (lane 1 vs. lanes 2 and 3 vs. lane 4). (D) Inhibition of *in vitro* translation by EDTA/KOH. In the presence of 2 mM or 5 mM EDTA/KOH, translation was significantly inhibited (lanes 1 and 2 vs. lane 3).

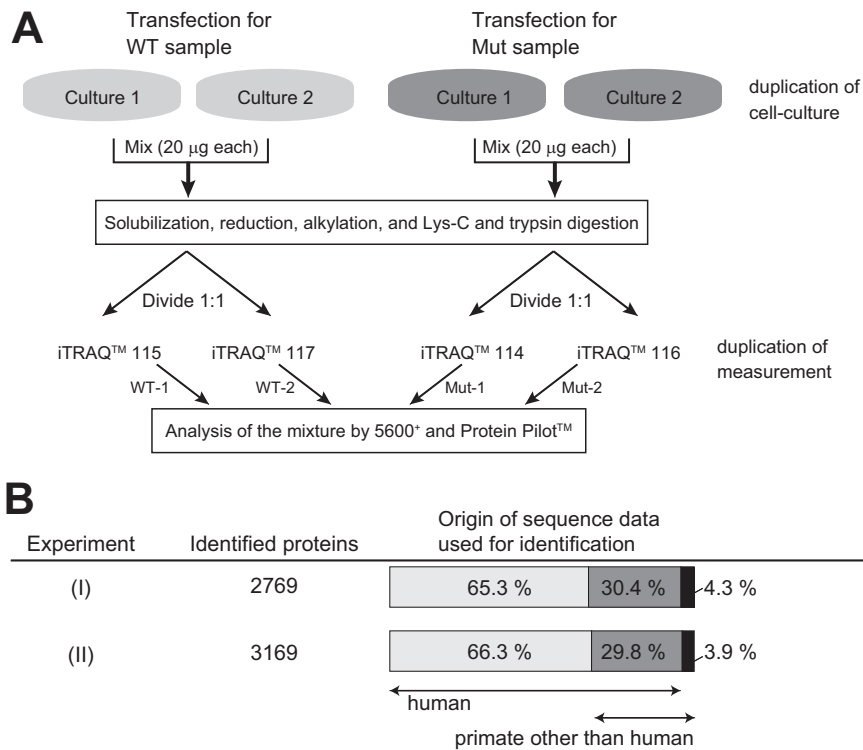

**Fig. S6.** Proteomic analysis of COS7 cells expressing CAPN3. (A) Schematic illustration of the experimental procedure. (B) Because COS7 cells were established from monkey, protein identification was performed using the human database supplemented with the sequences for other primates. More than 65% of proteins were found only in the human database.
